# Supplementary material
Source: publisher site journal article supplement (https://www.dovepress.com/article/458608)
Supplement: Supplementary file 1 [file get_supplementary_file.php]

**Supplementary Figure S1. Study flowchart**

ICSI, intracytoplasmic sperm injection; IVF, in vitro fertilization; PCOS, polycystic ovary syndrome.

**Supplementary Figure S2. Comparison for imbalance of covariates in the original and the adjusted (weighted) cohorts**

Covariate balance between the two groups in the propensity score-based patient-matching model. Mean differences are represented with red (unadjusted) and green dots (adjusted). Variables with standardized mean differences are marked with an asterisk.

AFC, antral follicle count; BMI, body mass index; ICSI, intracytoplasmic sperm injection; IVF, in vitro fertilization; NA, not applicable.
